# Supplementary material for: Precisely Monomeric Linear RNAs of Viroids Belonging to Pospiviroid and Hostuviroid Genera Are Infectious Regardless of Transcription Initiation Site and 5′-Terminal Structure
Source: MDPI journal article supplement (doi:10.3390/cells10112971), 2021-11-01
Supplement: s1 [file s1]

PSTVd-Int 2U cDNA clone

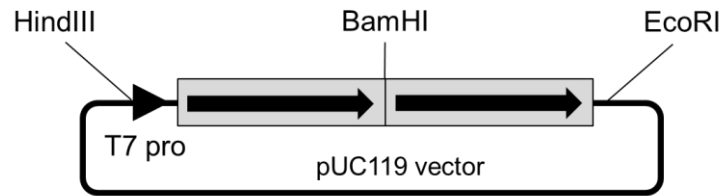

HSVd-citV1(270G) 2U cDNA clone

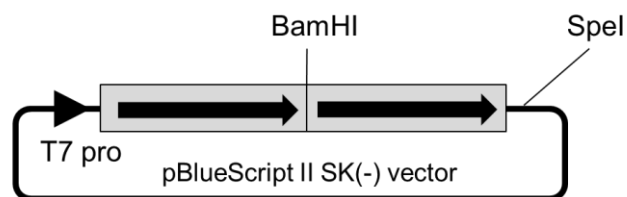

**Figure S1.** Construction of dimeric cDNA clones of potato spindle tuber viroid (PSTVd) and hop stunt viroid (HSVd). A gray rectangle indicates a unit-length viroid sequence. An arrow indicates the direction of viroid sequence. An arrowhead indicates T7 promoter sequence (T7 pro). EcoRI site in PSTVd clone and SpeI site in HSVd clone were used to linearize plasmids for the run-off transcription.

**Table S1.** List of primer pairs used in PCR

| Primer name   | Primer sequence 5'–3'                      | References                                          |
|---------------|--------------------------------------------|-----------------------------------------------------|
| PSTV-7P       | GGTTCCTGTGGTTCACACCTG                      | Hataya, 2009 [34]                                   |
| PSTV-7M       | GAACCAACTGCGGTTCCAAGG                      |                                                     |
| PSTV-13P      | TAATACGACTCACTATAGGGAAACCTGGAGCGAAC        | This study<br>PSTVd-Int-G96/G95<br>TCDVd-Ca-G97/G96 |
| PSTV-13M      | atggaattCGGGGATCCCTGAAGCGC<br>EcoRI        |                                                     |
| PSTV-22P      | TAATACGACTCACTATAGGTGGAAACAACCTGAAGC       | This study<br>PSTVd-Int-G265/C264                   |
| PSTV-22M      | tatcaattGGGTAGTAGCCGAAGCGAC<br>MunI (MfeI) |                                                     |
| PSTV-23P      | TAATACGACTCACTATAGGTTCCTGTGGTTCACAC        | This study<br>PSTVd-Int-G16/U15                     |
| PSTV-23M      | tcgtctagACGAGTTTAGTTCCGAGGAACC<br>XbaI     |                                                     |
| HSV-8         | CGCCTCTCGCTGGATTCTG                        | This study                                          |
| HSV-9         | GCGGTGCTCTGGAGTAGAG                        |                                                     |
| HSV-10P       | TAATACGACTCACTATAGGGCAACTCTTCTCAGAA        | This study<br>HSVd-citV1(270G)-<br>G82/G81          |
| HSV-10M       | taagtcgaCGGGGCTCCTTTCTCAGG<br>SalI         |                                                     |
| HSV-11P       | TAATACGACTCACTATAGATCCTCTCTTGAGCCCC        | This study<br>HSVd-citV1(270G)-<br>G284/G283        |
| PHSV268C      | GAGGATCCGCGGCAGAGG<br>BamHI                |                                                     |
| CSV-1P        | CTTAGGACCCCACTCCTGCG                       | Li et al., 1997 [30];<br>Nakahara et al., 1999 [33] |
| CSV-1M        | CCGCGATCTCGTCGGACTTC                       |                                                     |
| CSV-3P        | TAATACGACTCACTATAGGGAAACCTGGAGGAAG         | This study<br>CSVd-TP2-G93/G92                      |
| CSV-3M        | atggaattCGGGGATCCCTGAAGGAC<br>EcoRI        |                                                     |
| AtropaNad2.1a | GGACTCCTGACGTATACGAAGGATC                  | Thompson et al., 2003 [35];                         |
| AtropaNad2.2b | AGCAATGAGATTCCCCAATATCAT                   | Hataya, 2009 [34]                                   |

T7 promoter sequence is shown in blue letters in a forward primer sequence. Monomeric viroid RNA transcribed from the cDNA clone with T7 RNA polymerase is shown in red letters in "References." Restriction enzyme and its recognition sequence used to linearize a plasmid DNA for run-off transcription is shown in green letters in a reverse primer sequence. Lowercase letters in the reverse primer sequence indicate non-viroid sequence.
